# Supplementary material
Source: PubMed Central journal article supplement (PMC4340413)
Supplement: supp_M114.594762_jbc.M114.594762-1.pdf [file supp_M114.594762_jbc.M114.594762-1.pdf]

## **Supplemental Data**

A Major Determinant for Gliding Motility in *Mycoplasma genitalium*: the Interaction between the Terminal Organelle proteins MG200 and MG491

**Luca Martinelli, Daniela Lalli, Luis García-Morales, Mercè Ratera, Enrique Querol, Jaume Piñol, Ignacio Fita, and Bárbara M. Calisto**

### **MOVIES LEGENDS**

**MOVIES S1 – S3.** Microcinematographies of *M. genitalium* G37 WT cells (S1),  $\Delta p1c1$  cells (S2) and  $\Delta p1TC6$  cells (S3). Microcinematographies showing gliding motility of all strains used in this work. Each movie is composed of 61 frames, each one taken at intervals of 2 sec and the resulting motion pictures are shown at 8 frames/sec. Movies also contain superimposed drawings in red of selected mycoplasma tracks. Bar is 5  $\mu\text{m}$ .
